# Supplementary material for: MOF-derived crumpled-sheet-assembled perforated carbon cuboids as highly effective cathode active materials for ultra-high energy density Li-ion hybrid electrochemical capacitors (Li-HECs)
Source: Royal Society of Chemistry journal article supplement (doi:10.1039/c4nr00025k), 2014-01-01
Supplement: c4nr00025k1.pdf [file c4nr00025k1.pdf]

## Supporting Information

### MOF-derived crumpled-sheet-assembled perforated carbon cuboids as highly effective cathode active material for ultra-high energy density Li-ion hybrid electrochemical capacitors (Li-HEC))

*Abhik Banerjee,<sup>a</sup> Kush Kumar Upadhyay,<sup>a</sup> Dhanya Puthusseri,<sup>a</sup> Vachiappan Aravindan,<sup>b\*</sup> Srinivasan Madhavi,<sup>b,c\*</sup> and Satishchandra Ogale<sup>a,\*</sup>*

#### Supporting Information S1

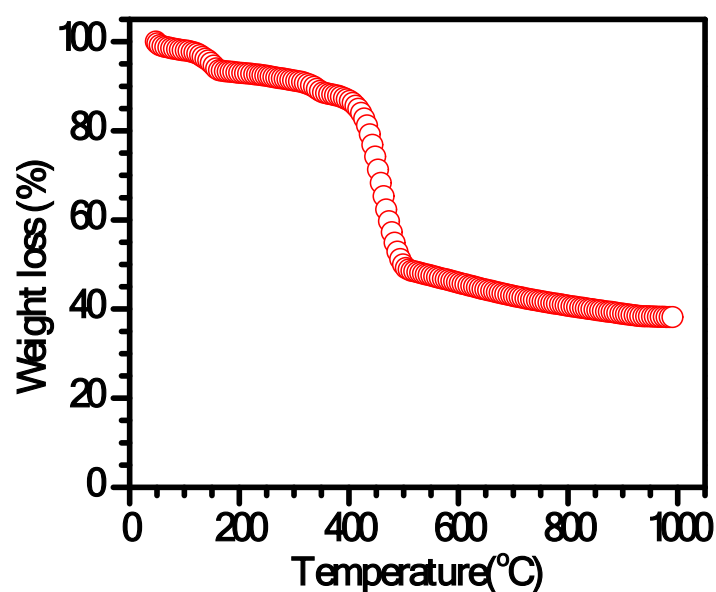

**Figure S1.** Thermo-gravimetric curves for MOF-5 in Ar flow at 5 °C min<sup>-1</sup>

## Supporting Information S2

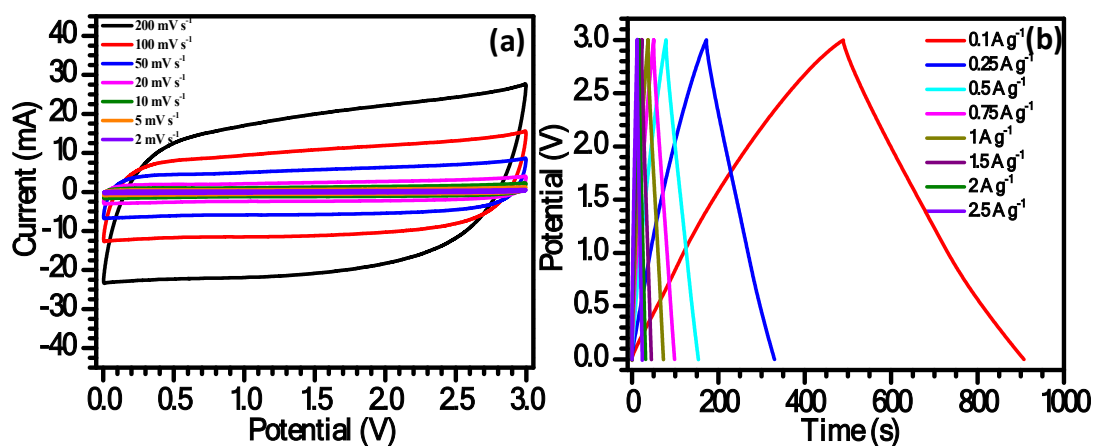

**Figure S2.** (a) Cyclic voltammogram of MOF-DC based symmetric supercapacitor in the presence of 1 M LiPF<sub>6</sub> in EC/DMC solution tested between 0-3 V at various scan rates. Each electrode is composed on 4 mg active mass loading over stainless steel substrate, and (b) Typical galvanostatic charge-discharge profiles of MOF-DC/MOF-DC symmetric supercapacitor cycled at various current densities. The applied current density is based on total active mass loading (4+4=8 mg), for example 1 A g<sup>-1</sup> corresponds to the applied current of 8 mA.

### Supporting Information S3

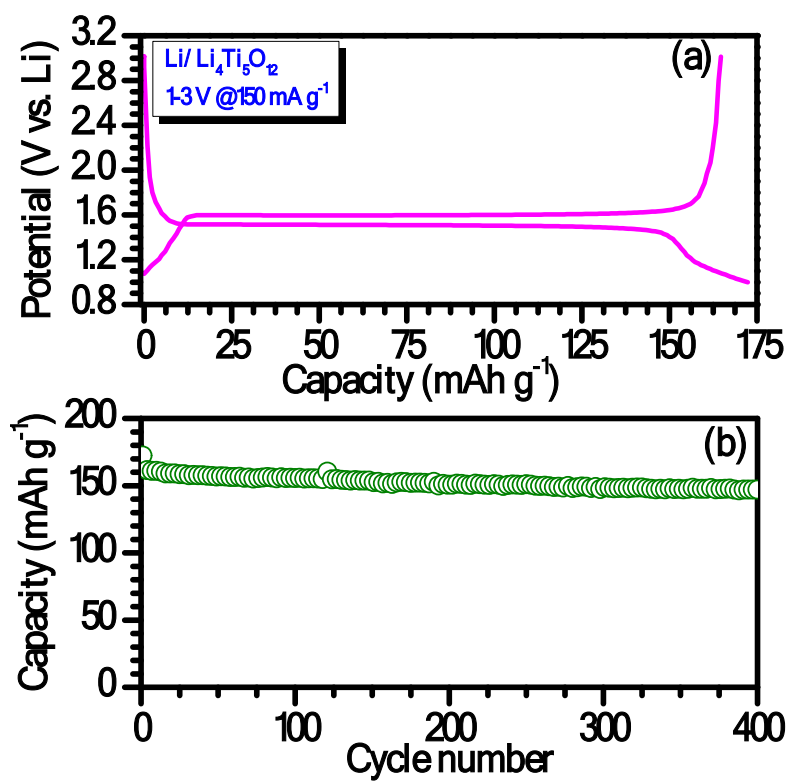

**Figure S3** (a) Galvanostatic charge-discharge curves of  $\text{Li}/\text{Li}_4\text{Ti}_5\text{O}_{12}$  (Sigma-Aldrich, USA) half-cells cycled between 1-3 V at constant current density of  $150\text{ mA g}^{-1}$ , and (b) Plot of discharge capacity vs. cycle number.
